# Supplementary material for: An electrodeposited molecularly imprinted quartz crystal microbalance sensor sensitized with AuNPs and rGO material for highly selective and sensitive detection of amantadine
Source: PubMed Central journal article supplement — RSC Adv. 2018 Feb 9;8(12):6600–7. doi: 10.1039/c7ra09958d (PMC9078277; doi:10.1039/c7ra09958d), 2018-02-09
Supplement: RA-008-C7RA09958D-s001.pdf [file RA-008-C7RA09958D-s001.pdf]

**Electrodeposited Molecularly Imprinted QCM Sensor Sensitized  
with AuNPs and rGO Material for Highly Selective and Sensitive  
Detection of Amantadine**

Yaguang Yun<sup>a, b</sup> <sup>||</sup>, Mingfei Pan<sup>a</sup> <sup>||</sup>, Guozhen Fang<sup>a</sup>, Ying Gu<sup>a</sup>, Wenjun Wen<sup>a</sup>, Rui  
Xue<sup>a</sup>, Shuo Wang<sup>a,\*</sup>

<sup>a</sup> Key Laboratory of Food Nutrition and Safety, Ministry of Education of China,  
Tianjin University of Science and Technology, Tianjin 300457, China

<sup>b</sup> Baotou Light Industry Vocational Technical College, Baotou 014035, China

**\*Corresponding author: Shuo Wang\***

Tel: (+86 22) 60912489

Fax: (+86 22) 60912489

E-mail: [s.wang@tust.edu.cn](mailto:s.wang@tust.edu.cn)

<sup>||</sup> Yaguang Yun and Mingfei Pan contributed equally to this work as the first authors.

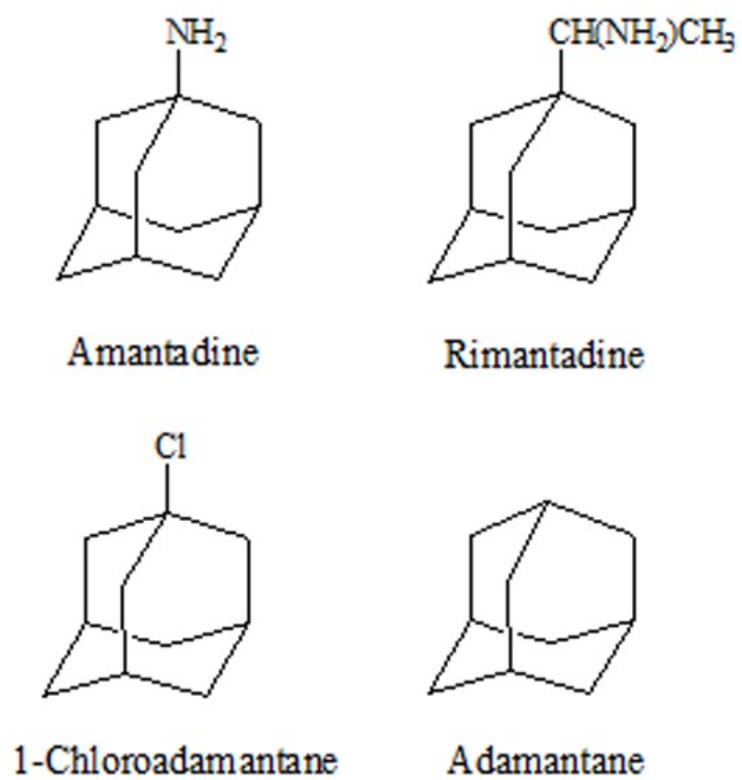

**Fig.S1.** The Chemical structure of AM and analogues.

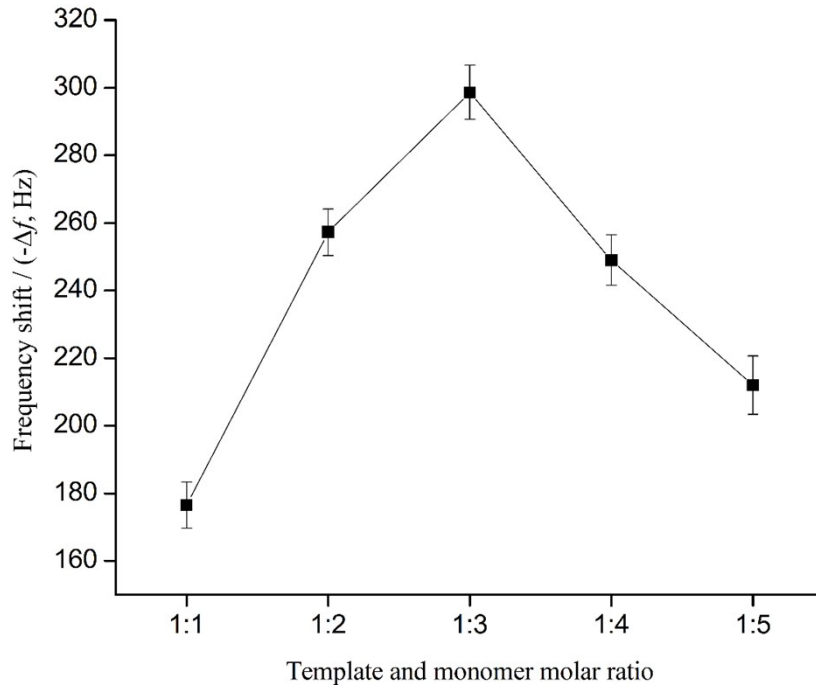

**Fig.S2.** Frequency shift of MIP modified electrodes with different template/monomer molar ratio.

Electrodeposition conditions: solution containing different ratio of *o*-AT and AM (10 mmol L<sup>-1</sup>), tetrabutylammonium perchlorate (5 mmol L<sup>-1</sup>) and HCl (10 mmol L<sup>-1</sup>);

Potential range: 0.2 - 1.4 V; scan rate: 50 mV s<sup>-1</sup>; scan number: 15. Tested solution:

AM-methanol solution (1.0 × 10<sup>-3</sup> mmol L<sup>-1</sup>)

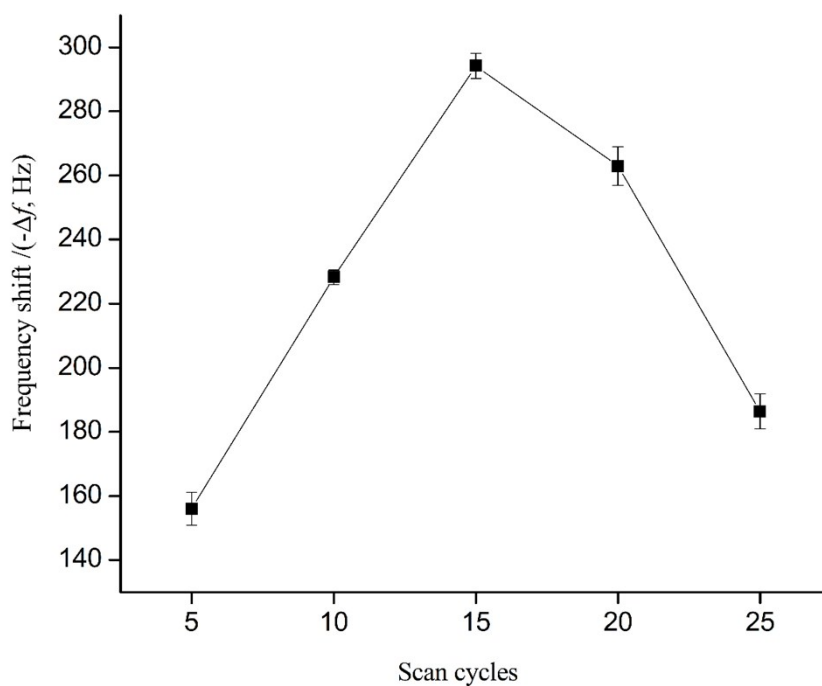

**Fig.S3.** Frequency shift of the different scanning cycles in electrodeposition process. Electrodeposition conditions: solution containing *o*-AT (30 mmol L<sup>-1</sup>) and AM (10 mmol L<sup>-1</sup>), tetrabutylammonium perchlorate (5 mmol L<sup>-1</sup>) and HCl (10 mmol L<sup>-1</sup>); Potential range: 0.2 - 1.4 V; scan rate: 50 mV s<sup>-1</sup>. Tested solution: AM-methanol solution (1.0 × 10<sup>-3</sup> mmol L<sup>-1</sup>)
